# Supplementary material
Source: PubMed Central journal article supplement (PMC2930436)
Supplement: 1005297107_st03.pdf [file 1005297107_st03.pdf]

1 **Table S3. Summary of glycoside hydrolases and carbohydrate-binding modules found in the Tammar wallaby foregut microbiome.**

| CAZy Family                                  | Pfam HMM Name   | Pfam Accession | Pfam description                                 | Known activities                                                                                                                       | Tammar foregut community |         |
|----------------------------------------------|-----------------|----------------|--------------------------------------------------|----------------------------------------------------------------------------------------------------------------------------------------|--------------------------|---------|
|                                              |                 |                |                                                  |                                                                                                                                        | Metagenome               | fosmids |
| <b>Glycoside hydrolase catalytic domains</b> |                 |                |                                                  |                                                                                                                                        |                          |         |
| GH1                                          | Glyco_hydro_1   | PF00232.10     | Glycosyl hydrolase family 1                      | $\beta$ -glucosidase, $\beta$ -galactosidase, 6-phospho- $\beta$ -glucosidase, $\beta$ -glucuronidase, others                          | 61                       | 1       |
| GH2                                          | Glyco_hydro_2_C | PF02836.9      | Glycosyl hydrolase family 2, TIM barallel domain | $\beta$ -galactosidase, $\beta$ -glucuronidase, $\beta$ -mannosidase, others                                                           | 24                       | 4       |
| GH3                                          | Glyco_hydro_3   | PF00933.13     | Glycosyl hydrolase family 3 N terminal domain    | $\beta$ -glucosidase                                                                                                                   | 72                       | 3       |
| GH4                                          | Glyco_hydro_4   | PF02056.8      | Family 4 glycosyl hydrolase                      | $\alpha$ -glucosidase, $\alpha$ -galactosidase, 6-phospho- $\beta$ -glucosidase, $\alpha$ -glucuronidase, others                       | 2                        | 0       |
| GH5                                          | Cellulase       | PF00150.10     | Cellulase (glycosyl hydrolase family 5)          | cellulase, $\beta$ -1,4-endoglucanase, $\beta$ -1,3-glucosidase, $\beta$ -1,4-endoxylanase, $\beta$ -1,4-endomannanase, others         | 10                       | 14      |
| GH6                                          | Glyco_hydro_6   | PF01341.9      | Glycosyl hydrolase family 6                      | endoglucanase, cellobiohydrolase                                                                                                       | 0                        | 1       |
| GH7                                          | Glyco_hydro_7   | PF00840.12     | Glycosyl hydrolase family 7                      | endoglucanase, cellobiohydrolase (fungal only)                                                                                         | 0                        | 0       |
| GH8                                          | Glyco_hydro_8   | PF01270.9      | Glycosyl hydrolase family 8                      | chitosanase, cellulase, licheninase, endo-1,4- $\beta$ -xylanase, others                                                               | 1                        | 1       |
| GH9                                          | Glyco_hydro_9   | PF00759.11     | Glycosyl hydrolase family 9                      | endoglucanase, cellobiohydrolase, $\beta$ -glucosidase                                                                                 | 0                        | 2       |
| GH10                                         | Glyco_hydro_10  | PF00331.12     | Glycosyl hydrolase family 10                     | endo-1,4- $\beta$ -xylanase, endo-1,3- $\beta$ -xylanase                                                                               | 11                       | 3       |
| GH11                                         | Glyco_hydro_11  | PF00457.9      | Glycosyl hydrolase family 11                     | Xylanase                                                                                                                               | 0                        | 0       |
| GH12                                         | Glyco_hydro_12  | PF01670.8      | Glycosyl hydrolase family 12                     | endoglucanase, xyloglucan hydrolase, $\beta$ -1,3-1,4-glucanase, xyloglucan endotransglycosylase                                       | 0                        | 0       |
| GH13                                         | Alpha-amylase   | PF00128.16     | Alpha amylase, catalytic domain                  | $\alpha$ -amylase, catalytic domains, and related enzymes                                                                              | 46                       | 3       |
| GH14                                         | Glyco_hydro_14  | PF01373.9      | Glycosyl hydrolase family 14                     | $\beta$ -amylase                                                                                                                       | 0                        | 0       |
| GH15                                         | Glyco_hydro_15  | PF00723.13     | Glycosyl hydrolase family 15                     | glucoamylase, glucodextranase, $\alpha$ , $\alpha$ -trehalase                                                                          | 0                        | 0       |
| GH16                                         | Glyco_hydro_16  | PF00722.13     | Glycosyl hydrolase family 16                     | endo-1,4- $\beta$ -galactosidase, endo-1,3- $\beta$ -glucanase, endo-1,3(4)- $\beta$ -glucanase, licheninase, $\beta$ -agarase, others | 4                        | 0       |
| GH17                                         | Glyco_hydro_17  | PF00322.9      | Glycosyl hydrolase family 17                     | glucan endo-1,3- $\beta$ -glucosidase, glucan 1,3- $\beta$ -glucosidase, licheninase, $\beta$ -1,3-glucan transglycosidase             | 0                        | 1       |
| GH18                                         | Glyco_hydro_18  | PF00704.20     | Glycosyl hydrolase family 18                     | chitinase, endo- $\beta$ -N-acetylglucosaminidase, others                                                                              | 3                        | 0       |
| GH19                                         | Glyco_hydro_19  | PF00182.11     | Chitinase class I                                | Chitinase                                                                                                                              | 0                        | 0       |
| GH20                                         | Glyco_hydro_20  | PF00728.14     | Glycosyl hydrolase family 20                     | $\beta$ -hexosaminidase, lacto-N-biosidase, $\beta$ -1,6-N-acetylglucosaminidase                                                       | 8                        | 0       |
| GH21                                         | deleted family  |                |                                                  |                                                                                                                                        |                          |         |
| GH22                                         | Lys             | PF00062.12     | C-type lysozyme/alpha-lactalbumin family         | lysozyme type C, lysozyme type i, $\alpha$ -lactalbumin                                                                                | 0                        | 0       |
| GH23                                         | SLT             | PF01464.12     | Transglycosylase SLT domain                      | lysozyme type G, peptidoglycan lyase                                                                                                   | 17                       | 0       |

|      |                 |            |                                                 |                                                                                                                                            |    |   |
|------|-----------------|------------|-------------------------------------------------|--------------------------------------------------------------------------------------------------------------------------------------------|----|---|
| GH24 | Phage_lysozyme  | PF00959.11 | Phage lysozyme                                  | Lysozyme                                                                                                                                   | 6  | 1 |
| GH25 | Glyco_hydro_25  | PF01183.12 | Glycosyl hydrolase family 25                    | Lysozyme                                                                                                                                   | 21 | 1 |
| GH26 | Glyco_hydro_26  | PF02156.7  | Glycosyl hydrolase family 26                    | $\beta$ -mannanase, $\beta$ -1,3-xylanase                                                                                                  | 5  | 8 |
| GH27 | Melibiose       | PF02065.10 | Melibiose                                       | $\alpha$ -galactosidase, $\alpha$ -N-acetylgalactosaminidase, isomalto-dextranase                                                          | 21 | 4 |
| GH28 | Glyco_hydro_28  | PF00295.9  | Glycosyl hydrolase family 28                    | polygalacturonase, rhamnogalacturonase, others                                                                                             | 2  | 1 |
| GH29 | Alpha_L_fucos   | PF01120.9  | Alpha-L-fucosidase                              | $\alpha$ -L-fucosidase                                                                                                                     | 2  | 1 |
| GH30 | Glyco_hydro_30  | PF02055.8  | O-Glycosyl hydrolase family 30                  | glucosylceramidase, $\beta$ -1,6-glucanase, $\beta$ -xylosidase                                                                            | 0  | 1 |
| GH31 | Glyco_hydro_31  | PF01055.13 | Glycosyl hydrolases family 31                   | $\alpha$ -glucosidase, $\alpha$ -1,3-glucosidase, $\alpha$ -xylosidase                                                                     | 13 | 2 |
| GH32 | Glyco_hydro_32N | PF00251.12 | Glycosyl hydrolases family 32 N terminal        | levanase, invertase, others                                                                                                                | 11 | 0 |
| GH33 | BNR             | PF02012.12 | BNR/Asp-box repeat                              | sialidase, neuraminidase, trans-sialidase                                                                                                  | 0  | 0 |
| GH34 | Neur            | PF00064.10 | Neuraminidase                                   | sialidase, neuraminidase                                                                                                                   | 0  | 0 |
| GH35 | Glyco_hydro_35  | PF01301.11 | Glycosyl hydrolases family 35                   | $\beta$ -galactosidase, exo- $\beta$ -glucosaminidase                                                                                      | 3  | 1 |
| GH36 | Blast search    |            |                                                 | $\alpha$ -galactosidase, $\alpha$ -N-acetylgalactosaminidase, stachyose synthase, raffinose synthase                                       | 26 | 4 |
| GH37 | Trehaalse       | PF01204.10 | Trehalase                                       | $\alpha$ , $\alpha$ -trehalase                                                                                                             | 0  | 0 |
| GH38 | Glyco_hydro_38  | PF01074.14 | Glycosyl hydrolases family 38 N-terminal domain | $\alpha$ -mannosidase, N-mannosyl-oligosaccharide $\alpha$ -1,3-1,6-mannosidase                                                            | 3  | 0 |
| GH39 | Glyco_hydro_39  | PF01229.9  | Glycosyl hydrolases family 39                   | $\alpha$ -L-iduronidase, $\beta$ -xylosidase                                                                                               | 1  | 0 |
| GH40 | deleted family  |            |                                                 |                                                                                                                                            |    |   |
| GH41 | deleted family  |            |                                                 |                                                                                                                                            |    |   |
| GH42 | Glyco_hydro_42  | PF02449.7  | Beta-galactosidase                              | $\beta$ -galactosidase                                                                                                                     | 8  | 1 |
| GH43 | Glyco_hydro_43  | PF04616.6  | Glycosyl hydrolases family 43                   | $\beta$ -xylosidase, $\beta$ -1,3-xylosidase, $\alpha$ -L-arabinofuranosidase, arabinanase, xylanase, galactan 1,3- $\beta$ -galactosidase | 10 | 9 |
| GH44 | Blast search    |            |                                                 | endoglucanase, xyloglucanase                                                                                                               | 0  | 0 |
| GH45 | Glyco_hydro_45  | PF02015.8  | Glycosyl hydrolases family 45                   | endoglucanase                                                                                                                              | 0  | 0 |
| GH46 | Glyco_hydro_46  | PF01374.10 | Glycosyl hydrolases family 46                   | Chitosanase                                                                                                                                | 0  | 0 |
| GH47 | Glyco_hydro_47  | PF01532.12 | Glycosyl hydrolases family 47                   | A-mannosidase                                                                                                                              | 0  | 0 |
| GH48 | Glyco_hydro_48  | PF02011.7  | Glycosyl hydrolases family 48                   | endoglucanase, chitinase, cellobiohydrolases, endo-processive cellulases                                                                   | 0  | 0 |
| GH49 | Glyco_hydro_49  | PF03718.5  | Glycosyl hydrolases family 49                   | dextranase, isopullulanase, dextran 1,6- $\alpha$ -isomaltotriosidase                                                                      | 0  | 0 |
| GH50 | Blast search    |            |                                                 | $\beta$ -agarase                                                                                                                           | 0  | 0 |
| GH51 | Blast search    |            |                                                 | $\alpha$ -L-arabinofuranosidase, endoglucanase                                                                                             | 12 | 1 |
| GH52 | Glyco_hydro_52  | PF03512.5  | Glycosyl hydrolases family 52                   | $\beta$ -xylosidase                                                                                                                        | 0  | 0 |
| GH53 | Glyco_hydro_53  | PF07745.5  | Glycosyl hydrolase family 53                    | endo-1,4- $\beta$ -galactanase                                                                                                             | 9  | 0 |
| GH54 | ArabFuran-catal | PF09206.3  | Alpha-L-arabinofuranosidase B, catalytic        | $\alpha$ -L-arabinofuranosidase, $\beta$ -xylosidase                                                                                       | 0  | 0 |
| GH55 | Blast search    |            |                                                 | exo-1,3-glucanase, endo-1,3-glucanase                                                                                                      | 1  | 0 |
| GH56 | Glyco_hydro_56  | PF01630.10 | Hyaluronidase                                   | hyaluronidase, chondroitin hydrolase                                                                                                       | 0  | 0 |

|      |                          |            |                                                         |                                                                                                         |    |   |
|------|--------------------------|------------|---------------------------------------------------------|---------------------------------------------------------------------------------------------------------|----|---|
| GH57 | Glyco_hydro_57           | PF03065.7  | Glycosyl hydrolase family 57                            | $\alpha$ -amylase, 4- $\alpha$ -glucanotransferase, $\alpha$ -galactosidase, amylopullulanase           | 3  | 2 |
| GH58 | Blast search             |            |                                                         | endo-N-acetylneuraminidase or endo-sialidase                                                            | 0  | 0 |
| GH59 | Glyco_hydro_59           | PF02057.7  | Glycosyl hydrolase family 59                            | galactocerebrosidase                                                                                    | 0  | 0 |
| GH60 | Deleted family           |            |                                                         |                                                                                                         |    |   |
| GH61 | Glyco_hydro_61           | PF03443.6  | Glycosyl hydrolase family 61                            | endoglucanase                                                                                           | 0  | 0 |
| GH62 | Glyco_hydro_62           | PF03664.5  | Glycosyl hydrolase family 62                            | $\alpha$ -L-arabinofuranosidase                                                                         | 0  | 0 |
| GH63 | Glyco_hydro_63           | PF03200.8  | Mannosyl oligosaccharide glucosidase                    | processing $\alpha$ -glucosidase, $\alpha$ -1,3-glucosidase, $\alpha$ -glucosidase                      | 0  | 0 |
| GH64 | Blast search             |            |                                                         | $\beta$ -1,3-glucanase                                                                                  | 0  | 0 |
| GH65 | Glyco_hydro_65m          | PF03632.7  | Glycosyl hydrolase family 65 central catalytic domain   | $\alpha$ , $\alpha$ -trehalase, maltose phosphorylase, trehalose phosphorylase, kojibiose phosphorylase | 4  | 0 |
| GH66 | Blast search             |            |                                                         | cycloisomaltooligosaccharide glucanotransferase, dextranase                                             | 0  | 0 |
| GH67 | Glyco_hydro_67M          | PF07488.4  | Glycosyl hydrolase family 67 middle domain              | $\alpha$ -glucuronidase, xylan $\alpha$ -1,2-glucuronosidase                                            | 5  | 0 |
| GH68 | Glyco_hydro_68           | PF02435.8  | Levansucrase/invertase                                  | levansucrase, $\beta$ -fructofuranosidase, inulosucrase                                                 | 0  | 0 |
| GH69 | Deleted: now family PL16 |            |                                                         |                                                                                                         |    |   |
| GH70 | Glyco_hydro_70           | PF02324.8  | Glycosyl hydrolase family 70                            | dextransucrase, alternansucrase                                                                         | 0  | 0 |
| GH71 | Glyco_hydro_71           | PF03659.6  | Glycosyl hydrolase family 71                            | $\alpha$ -1,3-glucanase                                                                                 | 0  | 0 |
| GH72 | Glyco_hydro_72           | PF03198.6  | Glycolipid anchored surface protein (GAS1)              | $\beta$ -1,3-glucanosyltransglycosylase                                                                 | 0  | 0 |
| GH73 | Glucosaminidase          | PF01832.12 | Mannosyl-glycoprotein endo-beta-N-acetylglucosaminidase | peptidoglycan hydrolase with endo- $\beta$ -N-acetylglucosaminidase specificity                         | 16 | 5 |
| GH74 | Blast search             |            |                                                         | endoglucanase, oligoxyloglucan reducing end-specific cellobiohydrolase, xyloglucanase                   | 1  | 0 |
| GH75 | Chitosanase              | PF07335.3  | Fungal chitosanase                                      | chitosanase                                                                                             | 0  | 0 |
| GH76 | Glyco_hydro_76           | PF03663.6  | Glycosyl hydrolase family 76                            | $\alpha$ -1,6-mannanase                                                                                 | 0  | 0 |
| GH77 | Glyco_hydro_77           | PF02446.9  | 4- $\alpha$ -glucanotransferase                         | amylomaltase or 4- $\alpha$ -glucanotransferase                                                         | 18 | 0 |
| GH78 | Bac_rhamnosid            | PF05592.3  | Bacterial alpha-L-rhamnosidase                          | $\alpha$ -L-rhamnosidase                                                                                | 25 | 0 |
| GH79 | Glyco_hydro_79n          | PF03662.6  | Glycosyl hydrolase family 79, N-terminal domain         | $\beta$ -glucuronidase, $\beta$ -4-O-methyl-glucuronidase, heparanase                                   | 0  | 0 |
| GH80 | Blast search             |            |                                                         | chitosanase                                                                                             | 0  | 0 |
| GH81 | Glyco_hydro_81           | PF03639.5  | Glycosyl hydrolase family 81                            | $\beta$ -1,3-glucanase                                                                                  | 0  | 0 |
| GH82 | Blast search             |            |                                                         | $\iota$ -carrageenase                                                                                   | 0  | 0 |
| GH83 | HN                       | PF00423.11 | Hemagglutinin-neuraminidase                             | neuraminidase                                                                                           | 0  | 0 |
| GH84 | NAGidase                 | PF07555.5  | Hyaluronidase                                           | N-acetyl $\beta$ -glucosaminidase, hyaluronidase                                                        | 3  | 0 |
| GH85 | Glyco_hydro_85           | PF03644.5  | Glycosyl hydrolase family 85                            | endo- $\beta$ -N-acetylglucosaminidase                                                                  | 0  | 0 |
| GH86 | Blast search             |            |                                                         | $\beta$ -agarase                                                                                        | 0  | 0 |
| GH87 | Blast search             |            |                                                         | mycodextranase, $\alpha$ -1,3-glucanase                                                                 | 0  | 0 |
| GH88 | Glyco_hydro_88           | PF07470.5  | Glycosyl hydrolase family 88                            | d-4,5 unsaturated $\beta$ -glucuronyl hydrolase                                                         | 8  | 1 |
| GH89 | NAGLU                    | PF05089.4  | Alpha-N-acetylglucosaminidase                           | $\alpha$ -N-acetylglucosaminidase                                                                       | 0  | 0 |

|                                     |                   |            |                                      |                                                                                                                     |          |   |
|-------------------------------------|-------------------|------------|--------------------------------------|---------------------------------------------------------------------------------------------------------------------|----------|---|
| GH90                                | Blast search      |            |                                      | endorhamnosidase                                                                                                    | 0        | 0 |
| GH91                                | Deleted: Now PL19 |            |                                      |                                                                                                                     |          |   |
| GH92                                | Glyco_hydro_92    | PF07971.4  | Glycosyl hydrolase family 92         | $\alpha$ -1,2-mannosidase                                                                                           | 14       | 2 |
| GH93                                | Blast search      |            |                                      | exo-1,5- $\alpha$ -L-arabinanase                                                                                    | 0        | 0 |
| GH94                                | Blast search      |            |                                      | cellobiose phosphorylase, cellodextrin phosphorylase, chitobiose phosphorylase, cyclic $\beta$ -1,2-glucan synthase | 18       | 7 |
| GH95                                | Blast search      |            |                                      | $\alpha$ -1,2-L-fucosidase, $\alpha$ -L-fucosidase                                                                  | 9        | 0 |
| GH96                                | Blast search      |            |                                      | $\alpha$ -agarase                                                                                                   | 0        | 0 |
| GH97                                | Glyco_hydro_97    | PF10566    | Glycosyl hydrolase family 97         | $\alpha$ -glucosidase, $\alpha$ -galactosidase                                                                      | 1        | 1 |
| GH98                                | Glyco_hydro_98M   | PF08306    | Glycosyl hydrolase family 98         | endo- $\beta$ -galactosidase                                                                                        | 1        | 0 |
| GH99                                | Blast search      |            |                                      | glycoprotein endo- $\alpha$ -1,2-mannosidase                                                                        | 0        | 0 |
| GH100                               | Invertase_neut    | PF04853.4  | Plant neutral invertase              | alkaline and neutral invertase                                                                                      | 0        | 0 |
| GH101                               | Blast search      |            |                                      | endo- $\alpha$ -N-acetylgalactosaminidase                                                                           | 0        | 0 |
| GH102                               | MltA              | PF03562.9  | MltA specific insert domain          | peptidoglycan lytic transglycosylase                                                                                | 0        | 0 |
| GH103                               | Blast search      |            |                                      | peptidoglycan lytic transglycosylase                                                                                | 2        | 0 |
| GH104                               | Phage_lysozyme    | PF00959.11 | Phage lysozyme                       | peptidoglycan lytic transglycosylase                                                                                | see GH24 |   |
| GH105                               | Glyco_hydro_88    | PF07470.5  | Glycosyl hydrolase family 88         | unsaturated rhamnogalacturonyl hydrolase                                                                            | see GH88 |   |
| GH106                               | Blast search      |            |                                      | $\alpha$ -L-rhamnosidase                                                                                            | 9        | 0 |
| GH107                               | Blast search      |            |                                      | sulfated fucan endo-1,4-fucanase                                                                                    | 0        | 0 |
| GH108                               | DUF847            | PF05838.4  |                                      | N-acetylmuramidase                                                                                                  | 2        | 0 |
| GH109                               | Blast search      |            |                                      | $\alpha$ -N-acetylgalactosaminidase                                                                                 | 3        | 0 |
| GH110                               | Blast search      |            |                                      | $\alpha$ -galactosidase, $\alpha$ -1,3-galactosidase                                                                | 0        | 0 |
| GH111                               | Blast search      |            |                                      | eratan sulfate hydrolase (endo- $\beta$ -N-acetylglucosaminidase)                                                   | 0        | 0 |
| GH112                               | Blast search      |            |                                      | lacto-N-biose phosphorylase or galacto-N-biose phosphorylase                                                        | 1        | 0 |
| GH113                               | Blast search      |            |                                      | $\beta$ -mannanase                                                                                                  | 1        | 0 |
| GH114                               | Blast search      |            |                                      | endo- $\alpha$ -1,4-polygalactosaminidase                                                                           | 0        | 0 |
| <b>Carbohydrate binding domains</b> |                   |            |                                      |                                                                                                                     |          |   |
| CBM1                                | CBM_1             | PF00734.10 | Fungal cellulose binding domain      | cellulose binding domain (mainly fungal, 1 viral)                                                                   | 0        | 0 |
| CBM2                                | CBM_2             | PF00553.11 | Cellulose binding domain             | cellulose binding domain                                                                                            | 1        | 0 |
| CBM3                                | CBM_3             | PF00942.10 | Cellulose binding domain             | cellulose binding domain                                                                                            | 0        | 0 |
| CBM4                                | CBM_4_9           | PF02018.9  | Carbohydrate binding domain          | xylan, $\beta$ -1,3-glucan, $\beta$ -1,3-1,4-glucan, $\beta$ -1,6-glucan and amorphous cellulose binding domain     | 6        | 3 |
| CBM5                                | CBM_5_12          | PF02839.6  | Carbohydrate binding domain          | cellulose binding domain                                                                                            | 0        | 0 |
| CBM6                                | CBM_6             | PF03422.7  | Carbohydrate binding module (fam. 6) | amorphous cellulose and xylan-binding domain                                                                        | 3        | 6 |
| CBM7                                | deleted entry     |            |                                      |                                                                                                                     |          |   |
| CBM8                                | Blast search      |            |                                      | cellulose binding domain                                                                                            | 0        | 0 |

|       |                 |            |                                            |                                                                                                                 |           |   |
|-------|-----------------|------------|--------------------------------------------|-----------------------------------------------------------------------------------------------------------------|-----------|---|
| CBM9  | CBM_4_9         | PF02018.9  | Carbohydrate binding domain                | xylan, $\beta$ -1,3-glucan, $\beta$ -1,3-1,4-glucan, $\beta$ -1,6-glucan and amorphous cellulose binding domain | see CBM4  |   |
| CBM10 | CBM_10          | PF02013.8  | Cellulose or protein binding domain        | cellulose binding domain                                                                                        | 0         | 0 |
| CBM11 | CBM_11          | PF03425.5  | Carbohydrate binding domain (fam 11)       | glucan binding domain                                                                                           | 0         | 0 |
| CBM12 | CBM_5_12        | PF02839.6  | Carbohydrate binding domain                | cellulose binding domain                                                                                        | see CBM5  |   |
| CBM13 | Ricin_B_lectin  | PF00652.14 | Ricin-type beta-trefoil lectin domain      | mannose and xylan binding                                                                                       | 2         | 0 |
| CBM14 | CBM_14          | PF01607.16 | Chitin binding Peritrophin-A domain        | chitin binding domain                                                                                           | 0         | 0 |
| CBM15 | CBM_15          | PF03426.6  | Carbohydrate binding domain (fam 15)       | xylan and xylooligosaccharides binding domain                                                                   | 0         | 0 |
| CBM16 | CBM_4_9         | PF02018.9  | Carbohydrate binding domain                | cellulose and glucomannan binding domain                                                                        | see CBM4  |   |
| CBM17 | CBM_17_28       | PF03424.6  | Carbohydrate binding domain (family 17/28) | amorphous cellulose, cellooligosaccharides and derivatized cellulose binding domains                            | 0         | 1 |
| CBM18 | Chitin_bind_1   | PF00187.11 | Chitin recognition protein                 | chitin binding domain                                                                                           | 0         | 0 |
| CBM19 | CBM_19          | PF03427.5  | Carbohydrate binding domain (fam 19)       | chitin binding domain                                                                                           | 0         | 0 |
| CBM20 | CBM_20          | PF00686.11 | Starch binding domain                      | starch binding domain                                                                                           | 3         | 0 |
| CBM21 | CBM_21          | PF03370.5  | Putative phosphatase regulatory subunit    | starch binding domain (mainly eukaryotic, 1 bacterial)                                                          | 1         | 0 |
| CBM22 | CBM_4_9         | PF02018.9  | Carbohydrate binding domain                | xylan binding domain                                                                                            | see CBM4  |   |
| CBM23 | Blast search    |            |                                            | mannan binding domain                                                                                           | 0         | 0 |
| CBM24 | Blast search    |            |                                            | $\alpha$ -1,3-Glucan (mutan) binding domain                                                                     | 0         | 0 |
| CBM25 | CBM_25          | PF03423.5  | Carbohydrate binding domain (fam 25)       | starch binding domain                                                                                           | 0         | 0 |
| CBM26 | Blast search    |            |                                            | starch binding domain                                                                                           | 1         | 0 |
| CBM27 | CBM27           | PF09212.2  | Carbohydrate binding module 27             | mannan binding domain                                                                                           | 0         | 0 |
| CBM28 | CBM_17_28       | PF03424.6  | Carbohydrate binding domain (family 17/28) | non-crystalline cellulose, cellooligosaccharides, and $\beta$ -(1,3)(1,4)-glucan                                | see CBM17 | 0 |
| CBM29 | Blast search    |            |                                            | mannan/glucomannan binding domain                                                                               | 0         | 0 |
| CBM30 | Blast search    |            |                                            | cellulose binding domain                                                                                        | 0         | 0 |
| CBM31 | Blast search    |            |                                            | $\beta$ -1,3-xylan binding domain                                                                               | 0         | 0 |
| CBM32 | F5_F8_type_C    | PF00754.17 | F5/8 type C domain                         | galactose and lactose binding domain                                                                            | 6         | 1 |
| CBM33 | Chitin_bind_3   | PF03067.7  | Chitin binding domain                      | chitin binding domain                                                                                           | 0         | 0 |
| CBM34 | Alpha-amylase_N | PF02903.6  | Alpha amylase, N-terminal ig-like domain   | starch binding domain, , associated with GH13                                                                   | 2         | 0 |
| CBM35 | Blast search    |            |                                            | xylan, mannan and $\beta$ -galactan binding domain                                                              | 0         | 0 |
| CBM36 | Blast search    |            |                                            | xylans and xylooligosaccharides binding domain                                                                  | 0         | 0 |
| CBM37 | Blast search    |            |                                            | broad binding specificity                                                                                       | 0         | 0 |
| CBM38 | Blast search    |            |                                            | inulin binding domain                                                                                           | 0         | 0 |
| CBM39 | Blast search    |            |                                            | $\beta$ -1,3-glucan binding domain                                                                              | 0         | 0 |
| CBM40 | Sialidase       | PF02973.8  | Sialidase, N-terminal domain               | sialic acid binding domain                                                                                      | 0         | 0 |
| CBM41 | PUD             | PF03714.6  | Bacterial pullanase-associated domain      | $\alpha$ -glucans amylose, amylopectin, pullulan, and oligosaccharide binding domain                            | 0         | 0 |
| CBM42 | AbfB            | PF05270.5  | Alpha-L-arabinofuranosidase B (ABFB)       | arabinofuranose binding domain                                                                                  | 0         | 0 |
| CBM43 | X8              | PF07983.5  | X8 domain                                  | $\beta$ -1,3-glucan binding domain                                                                              | 0         | 0 |
| CBM44 | Blast search    |            |                                            | cellulose and xyloglucan binding domain                                                                         | 0         | 0 |

|                               |                 |            |                                                               |                                                                                                                                                   |           |   |
|-------------------------------|-----------------|------------|---------------------------------------------------------------|---------------------------------------------------------------------------------------------------------------------------------------------------|-----------|---|
| CBM45                         | Blast search    |            |                                                               | starch binding domain                                                                                                                             | 0         | 0 |
| CBM46                         | Blast search    |            |                                                               | cellulose binding domain                                                                                                                          | 0         | 0 |
| CBM47                         | F5_F8_type_C    | PF00754.17 | F5/8 type C domain                                            | fucose binding domain                                                                                                                             | see CBM32 |   |
| CBM48                         | CBM_48          | PF02922.10 | Carbohydrate-binding module 48 (Isoamylase N-terminal domain) | glycogen binding domain, associated with GH13                                                                                                     | 22        | 0 |
| CBM49                         | CBM_49          | PF09478.2  | Carbohydrate binding domain CBM49                             | crystalline cellulose binding domain                                                                                                              | 0         | 0 |
| CBM50                         | LysM            | PF01476.12 | LysM domain                                                   | broad binding specificity                                                                                                                         | 47        | 0 |
| CBM51                         | NPCBM           | PF08305.3  | NPCBM/NEW2 domain                                             | galactose binding domain                                                                                                                          | 1         | 0 |
| CBM52                         | Blast search    |            |                                                               | $\beta$ -1,3-glucan binding domain (eukaryotic only)                                                                                              | 0         | 0 |
| CBM53                         | Blast search    |            |                                                               | unknown (eukaryotic only)                                                                                                                         | 0         | 0 |
| <b>Carbohydrate esterases</b> |                 |            |                                                               |                                                                                                                                                   |           |   |
| CE1                           | Blast search    |            | Carbohydrate Esterase Family 1                                | acetyl xylan esterase, cinnamoyl esterase, feruloyl esterase                                                                                      | 0         | 0 |
| CE2                           | Blast search    |            | Carbohydrate Esterase Family 2                                | acetyl xylan esterase                                                                                                                             | 0         | 0 |
| CE3                           | Blast search    |            | Carbohydrate Esterase Family 3                                | acetyl xylan esterase                                                                                                                             | 0         | 0 |
| CE4                           | Polysacc_deac_1 | PF01522.13 | Polysaccharide deacetylase                                    | acetyl xylan esterase, chitin deacetylase, chitooligosaccharide deacetylase                                                                       | 24        | 0 |
| CE5                           | Blast search    |            | Carbohydrate Esterase Family 5                                | acetyl xylan esterase, cutinase                                                                                                                   | 0         | 0 |
| CE6                           | Blast search    |            | Carbohydrate Esterase Family 6                                | acetyl xylan esterase                                                                                                                             | 0         | 0 |
| CE7                           | Blast search    |            | Carbohydrate Esterase Family 7                                | acetyl xylan esterase, cephalosporin-C deacetylase                                                                                                | 3         | 0 |
| CE8                           | Pectinesterase  | PF01095.11 | Pectinesterase                                                | pectin methylesterase                                                                                                                             | 3         | 0 |
| CE9                           | Blast search    |            | Carbohydrate Esterase Family 9                                | N-acetylglucosamine 6-phosphate deacetylase, N-acetylgalactosamine-6-phosphate deacetylase                                                        | 14        | 0 |
| CE10                          | Blast search    |            | Carbohydrate Esterase Family 10                               | Arylesterase, carboxyl esterase, acetylcholinesterase, cholinesterase, sterol esterase, brefeldin A esterase                                      | 18        | 3 |
| CE11                          | LpxC            | PF03331.5  | UDP-3-0-acyl N-acetylglucosamine deacetylase                  | UDP-3-0-acyl N-acetylglucosamine deacetylase                                                                                                      | 2         | 0 |
| CE12                          | Blast search    |            | Carbohydrate Esterase Family 12                               | pectin acetylesterase, rhamnogalacturonan acetylesterase, acetyl xylan esterase                                                                   | 6         | 0 |
| CE13                          | Blast search    |            | Carbohydrate Esterase Family 13                               | pectin acetylesterase                                                                                                                             | 0         | 0 |
| CE14                          | PIG-L           | PF02585.9  | GlcNAc-PI de-N-acetylase                                      | N-acetyl-1-D-myo-inositol-2-amino-2-deoxy- $\alpha$ -D-glucopyranoside deacetylase, diacetylchitobiose deacetylase, mycothiol S-conjugate amidase | 1         | 0 |
| CE15                          | Blast search    |            | Carbohydrate Esterase Family 15                               | 4-O-methyl-glucuronoyl methylesterase                                                                                                             | 0         | 0 |
| CE16                          | Blast search    |            | Carbohydrate Esterase Family 16                               | acetylesterase                                                                                                                                    | 0         | 0 |
| <b>Polysaccharide lyases</b>  |                 |            |                                                               |                                                                                                                                                   |           |   |
| PL1                           | Pec_lyase_C     | PF00544.11 | Pectate lyase                                                 | pectate lyase, exo-pectate lyase, pectin lyase                                                                                                    | 1         | 0 |
| PL2                           | Blast search    |            | Polysaccharide Lyase Family 2                                 | pectate lyase, exo-polygalacturonate lyase                                                                                                        | 0         | 0 |
| PL3                           | Pectate_lyase   | PF03211.6  | Pectate lyase                                                 | pectate lyase                                                                                                                                     | 0         | 0 |

|                                                                                   |                 |            |                                                  |                                                                               |    |   |
|-----------------------------------------------------------------------------------|-----------------|------------|--------------------------------------------------|-------------------------------------------------------------------------------|----|---|
| PL4                                                                               | Blast search    |            | Polysaccharide Lyase Family 4                    | rhamnogalacturonan lyase                                                      | 0  | 0 |
| PL5                                                                               | Alginate_lyase  | PF05426.5  | Alginate lyase                                   | alginate lyase                                                                | 1  | 0 |
| PL6                                                                               | Blast search    |            | Polysaccharide Lyase Family 6                    | alginate lyase, chondroitinase B                                              | 0  | 0 |
| PL7                                                                               | Blast search    |            | Polysaccharide Lyase Family 7                    | alginate lyase, $\alpha$ -L-gulonate lyase                                    | 0  | 1 |
| PL8                                                                               | Lyase_8         | PF02278.11 | Polysaccharide Lyase Family 8                    | hyaluronate lyase, chondroitin AC lyase, xanthan lyase, chondroitin ABC lyase | 0  | 0 |
| PL9                                                                               | Blast search    |            | Polysaccharide Lyase Family 9                    | pectate lyase, exopolysaccharide lyase                                        | 0  | 0 |
| PL10                                                                              | Blast search    |            | Polysaccharide Lyase Family 10                   | pectate lyase                                                                 | 0  | 0 |
| PL11                                                                              | Blast search    |            | Polysaccharide Lyase Family 11                   | rhamnogalacturonan lyase                                                      | 0  | 0 |
| PL12                                                                              | Blast search    |            | Polysaccharide Lyase Family 12                   | heparin-sulfate lyase                                                         | 0  | 0 |
| PL13                                                                              | Blast search    |            | Polysaccharide Lyase Family 13                   | heparin lyase                                                                 | 0  | 0 |
| PL14                                                                              | Blast search    |            | Polysaccharide Lyase Family 14                   | alginate lyase, polysaccharide lyase acting on glucuronic acid                | 0  | 0 |
| PL15                                                                              | Blast search    |            | Polysaccharide Lyase Family 15                   | oligo-alginate lyase                                                          | 0  | 0 |
| PL16                                                                              | Blast search    |            | Polysaccharide Lyase Family 16                   | hyaluronan lyase                                                              | 0  | 0 |
| PL17                                                                              | Blast search    |            | Polysaccharide Lyase Family 17                   | alginate lyase                                                                | 0  | 0 |
| PL18                                                                              | Blast search    |            | Polysaccharide Lyase Family 18                   | alginate lyase                                                                | 0  | 0 |
| PL19                                                                              | Blast search    |            | Polysaccharide Lyase Family 19                   | inulin lyase, di-fructofuranose 1,2':2,3' dianhydride hydrolase               | 0  | 0 |
| PL20                                                                              | Blast search    |            | Polysaccharide Lyase Family 20                   | endo- $\beta$ -1,4-glucuronan lyase                                           | 0  | 0 |
| PL21                                                                              | Blast search    |            | Polysaccharide Lyase Family 21                   | heparin lyases                                                                | 0  | 0 |
| <b>Other domains associated with GH catalytic or carbohydrate binding domains</b> |                 |            |                                                  |                                                                               |    |   |
|                                                                                   | AXE1            | PF05448.5  | Acetyl xylan esterase                            | Acetyl xylan esterases                                                        | 8  | 5 |
|                                                                                   | Alpha-amylase_C | PF02806.10 | Alpha amylase, C-terminal all-beta domain        | associated with GH13                                                          | 11 | 1 |
|                                                                                   | Alpha-L-AF_C    | PF06964.4  | Alpha-L-arabinofuranosidase C-terminus           | associated with GH51                                                          | 13 | 1 |
|                                                                                   | Alpha-mann_mid  | PF09261.3  | Alpha mannosidase, middle domain                 | associated with GH38                                                          | 0  | 0 |
|                                                                                   | Bac_rhamnosid_N | PF08531.2  | Alpha-L-rhamnosidase N-terminal domain           | associated with GH78                                                          | 20 | 0 |
|                                                                                   | Big_1           | PF02369.8  | Bacterial Ig-like domain (group 1)               | bacterial Ig-like domain (group 1)                                            | 0  | 0 |
|                                                                                   | Big_2           | PF02368.10 | Bacterial Ig-like domain (group 2)               | bacterial Ig-like domain (group 2)                                            | 30 | 2 |
|                                                                                   | Big_3           | PF07523.4  | Bacterial Ig-like domain (group 3)               | bacterial Ig-like domain (group 3)                                            | 0  | 0 |
|                                                                                   | Big_4           | PF07532.3  | Bacterial Ig-like domain (group 4)               | bacterial Ig-like domain (group 4)                                            | 1  | 0 |
|                                                                                   | Bgal_small_N    | PF02929.9  | Beta galactosidase small chain                   | dimeric beta-galactosidases, small chain; associated with GH2                 | 6  | 1 |
|                                                                                   | CBM_X           | PF06204.3  | Putative carbohydrate binding domain             | carbohydrate binding domain, associated with GH94                             | 13 | 7 |
|                                                                                   | CelD_N          | PF02927.6  | N-terminal ig-like domain of cellulase           | associated with GH9                                                           | 0  | 2 |
|                                                                                   | CHB_HEX         | PF03173.5  | Putative carbohydrate binding domain             | associated with GH20                                                          | 0  | 0 |
|                                                                                   | CHB_HEX_C       | PF03174.5  | Chitobiase/beta-hexosaminidase C-terminal domain | associated with GH20                                                          | 1  | 0 |
|                                                                                   | ChiC            | PF06483.3  | Chitinase C                                      | associated with GH18                                                          | 0  | 0 |

|                     |            |                                                                        |                                                                      |    |    |
|---------------------|------------|------------------------------------------------------------------------|----------------------------------------------------------------------|----|----|
| ChitinaseA_N        | PF08329.2  | Chitinase A, N-terminal domain                                         | associated with GH18                                                 | 0  | 0  |
| Cohesin             | PF00963.10 | Cohesin domain                                                         | Cohesin domain                                                       | 0  | 0  |
| Dockerin_1          | PF00404.10 | Dockerin type I repeat                                                 | Dockerin type I repeat                                               | 41 | 1  |
| fn3                 | PF00041.13 | Fibronectin type III domain                                            | Fibronectin type III domain                                          | 7  | 0  |
| GDE_C               | PF06202    | Amylo-alpha-1,6-glucosidase                                            | amylo-alpha-1,6-glucosidase                                          | 6  | 2  |
| Glucodextran_B      | PF09136.2  | Glucodextranase, domain B                                              | associated with GH15                                                 | 0  | 0  |
| Glucodextran_N      | PF09137.3  | Glucodextranase, domain N                                              | associated with GH15                                                 | 0  | 0  |
| Glyco_hydro_2_N     | PF02837    | Glycosyl hydrolases family 2, sugar binding domain                     | $\beta$ -galactosidase, $\beta$ -mannosidase, $\beta$ -glucuronidase | 67 | 4  |
| Glyco_hydro_2       | PF00703.13 | Glycosyl hydrolases family 2, immunoglobulin-like beta-sandwich domain | $\beta$ -galactosidase, $\beta$ -mannosidase, $\beta$ -glucuronidase | 19 | 2  |
| Glyco_hydro_3_C     | PF01915.14 | Glycosyl hydrolase family 3 C terminal domain                          | $\beta$ -glucan binding? associated with GH3                         | 45 | 2  |
| Glyco_hydro_20b     | PF02838.7  | Glycosyl hydrolase family 20, domain 2                                 | domain 2                                                             | 0  | 0  |
| Glyco_hydro_32C     | PF08244.4  | Glycosyl hydrolases family 32 C terminal                               | C-terminal domain                                                    | 10 | 0  |
| Glyco_hydro_38C     | PF07748.5  | Glycosyl hydrolases family 38 C-terminal domain                        | C-terminal domain                                                    | 1  | 0  |
| Glyco_hydro_42M     | PF08532.2  | Beta-galactosidase trimerisation domain                                | trimerisation domain                                                 | 6  | 0  |
| Glyco_hydro_42C     | PF08533.2  | Beta-galactosidase C-terminal domain                                   | C-terminal domain                                                    | 4  | 0  |
| Glyco_hydro_65N     | PF03636.7  | Glycosyl hydrolase family 65, N-terminal domain                        | N-terminal domain                                                    | 3  | 0  |
| Glyco_hydro_65C     | PF03633.7  | Glycosyl hydrolase family 65, C-terminal domain                        | C-terminal domain                                                    | 1  | 0  |
| Glyco_hydro_67N     | PF03648.6  | Glycosyl hydrolase family 67 N-terminus                                | N-terminal domain                                                    | 0  | 0  |
| Glyco_hydro_67C     | PF07477.4  | Glycosyl hydrolase family 67 C-terminus                                | C-terminal domain                                                    | 1  | 0  |
| Glyco_hydro_98C     | PF08307.3  | Glycosyl hydrolase family 98 C-terminal domain                         | C-terminal domain                                                    | 1  | 0  |
| Glyco_transf_36     | PF06165.3  | Glycosyltransferase family 36                                          | associated with GH94                                                 | 13 | 7  |
| GT36_AF             | PF06205.3  | Glycosyltransferase 36 associated family                               | associated with GH94                                                 | 9  | 6  |
| He_PIG              | PF05345.4  | Putative Ig domain                                                     | Putative Ig domain                                                   | 0  | 0  |
| PKD                 | PF00801.12 | PKD domain                                                             | PKD domain                                                           | 17 | 0  |
| TIG                 | PF01833.16 | IPT/TIG domain                                                         | Ig-like domain                                                       | 0  | 0  |
| SusD                | PF07980.4  | SusD family                                                            | carbohydrate binding domain                                          | 42 | 7  |
| TonB_dep_rec (SusC) | PF00593.17 | TonB_dep_rec (SusC)                                                    | interacts with SusD / transport                                      | 36 | 15 |

1

2
