# Supplementary material
Source: PubMed Central journal article supplement (PMC2930436)
Supplement: 1005297107_st04.pdf [file 1005297107_st04.pdf]

1 **Table S4. Summary of glycoside hydrolases encoded within scaffolds reconstructed from sequenced fosmids selected from functional**  
 2 **genomic screens.**

| Scaffold | GH2 | GH3 | GH5 | GH6 | GH8 | GH9 | GH10              | GH16              | GH26 | GH27 | GH43 | GH94               | <i>susD</i> | <i>tonB</i> | Phylo. Binning   | C | X |
|----------|-----|-----|-----|-----|-----|-----|-------------------|-------------------|------|------|------|--------------------|-------------|-------------|------------------|---|---|
| Sc7      |     |     |     |     |     | 1   |                   |                   |      |      |      |                    |             |             | Bacteria         | + | - |
| Sc30     |     |     | 1   |     |     |     |                   |                   |      |      |      | 1 <sup>CBM_X</sup> |             | 1           | Bacteria         | + | - |
| Sc36     |     |     | 1   |     |     |     |                   |                   |      |      |      |                    |             |             | δ-Proteobacteria | + | - |
| Sc41     |     |     |     | 1   |     |     |                   |                   |      |      |      |                    |             |             | Clostridia       | + | - |
| Sc52     |     |     | 1   |     |     |     |                   |                   |      |      |      |                    |             |             | Lachnospiraceae  | + | - |
| Sc65     |     |     | 1   |     |     |     |                   | 1 <sup>CBM4</sup> |      |      |      |                    |             |             | Lachnospiraceae  | + | - |
| Sc75     |     |     | 1   |     |     |     |                   |                   |      |      |      |                    |             |             | Lachnospiraceae  | + | - |
| Sc47     |     |     | 1   |     |     |     |                   |                   | 2    | 1    |      |                    |             |             | Bacteroidales    | + | - |
| Sc106    |     |     | 1   |     |     |     |                   |                   |      |      |      | 1 <sup>CBM_X</sup> |             |             | Bacteroidales    | + | - |
| Sc77     |     |     |     |     |     | 1   |                   |                   |      |      |      |                    |             |             | Bacteroidales    | + | - |
| Sc58     |     |     | 1   |     |     |     |                   |                   | 1    |      |      |                    | 1           | 1           | Bacteroidales    | + | - |
| Sc17     |     |     | 1   |     |     |     |                   |                   | 1    | 2    |      | 1 <sup>CBM_X</sup> | 1           | 1           | Bacteroidales    | + | - |
| Sc100    | 1   |     | 2   |     |     |     |                   |                   | 1    |      |      | 1 <sup>CBM_X</sup> | 1           | 1           | Bacteroidales    | + | - |
| Sc104    |     |     | 1   |     |     |     |                   |                   | 1    | 1    |      | 1 <sup>CBM_X</sup> | 1           | 1           | Bacteroidales    | + | + |
| Sc78     | 1   |     | 2   |     |     |     |                   |                   | 1    | 1    |      | 1 <sup>CBM_X</sup> | 1           | 1           | Bacteroidales    | + | + |
| Sc57     |     |     |     |     |     |     | 1                 |                   |      |      |      | 1                  | 1           | 1           | Bacteroidales    | - | + |
| Sc8      |     |     |     |     |     |     | 1 <sup>CBM6</sup> |                   |      |      |      | 1 <sup>CBM6</sup>  |             |             | Bacteroidales    | - | + |
| Sc73     |     |     |     |     |     |     | 1                 |                   |      |      |      | 1                  |             |             | Bacteroidales    | - | + |

3 C Cellulose degrading activity detected using carboxymethyl cellulose as a substrate. X Xylan degrading activity detected using birchwood xylan as a substrate.

4 Carbohydrate binding modules (CBMs) are indicated in superscript text.

5

6
