# Supplementary material
Source: PubMed Central journal article supplement (PMC2930436)
Supplement: 1005297107_st05.pdf [file 1005297107_st05.pdf]

1 **Table S5. Major metabolic pathways and structures deduced from the putative partial genome of WG-2.**

| Gene ID                                 | Protein/<br>Function                                                                     | Contig  | Length<br>(bp) | G+C<br>% | Read<br>depth | Phylopythia                      | Homolog<br>Lachnospiraceae |
|-----------------------------------------|------------------------------------------------------------------------------------------|---------|----------------|----------|---------------|----------------------------------|----------------------------|
| <b><u>Glycolysis</u></b>                |                                                                                          |         |                |          |               |                                  |                            |
| 2013446292                              | glucose-6-phosphate isomerase<br>6-phosphofructokinase<br>fructose-bisphosphate aldolase | C9199   | 10584          | 44       | 6.4           | Lachnospiraceae sp.              | yes**                      |
| 2013446902                              | glyceraldehyde-3-phosphate dehydrogenase                                                 | C9451   | 2012           | 45       | 3.9           | Lachnospiraceae sp. <sup>¶</sup> | yes*                       |
| 2013445377                              | alpha-phosphoglucomutase                                                                 | C8762   | 12789          | 45       | 5.1           | Lachnospiraceae sp.              | yes**                      |
| 2013446916                              | phosphoglycerate mutase                                                                  | C9454   | 7622           | 45       | 5             | Lachnospiraceae sp.              | yes**                      |
| 2013446905                              | phosphoglycerate kinase                                                                  | C9452   | 3835           | 43       | 4             | Lachnospiraceae sp.              | yes**                      |
| 2013444759                              | Enolase                                                                                  | C8508   | 2175           | 40       | 2.5           | Lachnospiraceae sp. <sup>¶</sup> | yes                        |
| 2013451643                              | pyruvate kinase                                                                          | C11466  | 3955           | 45       | 2.1           | Lachnospiraceae sp.              | yes**                      |
| 2013447455                              | Glucokinase                                                                              | C9679   | 2759           | 48       | 2.6           | Lachnospiraceae sp.              | yes**                      |
| <b><u>Pentose phosphate pathway</u></b> |                                                                                          |         |                |          |               |                                  |                            |
| 2013433023                              | Transketolase                                                                            | C3456   | 9947           | 44       | 4.4           | Lachnospiraceae sp.              | yes                        |
| 2013433024                              | Transaldolase                                                                            | C3456   | 9947           | 44       | 4.4           | Lachnospiraceae sp.              | yes                        |
| 2013442088                              | ribulose-5-phosphate 3-epimerase                                                         | C7421   | 4643           | 44       | 5.3           | Lachnospiraceae sp.              | yes**                      |
| 2013436018                              | ribulose-5-phosphate 3-epimerase                                                         | C4735   | 17773          | 41       | 3.6           | Lachnospiraceae sp.              | yes                        |
| 2013436017                              | ribose 5-phosphate isomerase                                                             | C4735   | 17773          | 41       | 3.6           | Lachnospiraceae sp.              | yes                        |
| <b><u>Butyrate production</u></b>       |                                                                                          |         |                |          |               |                                  |                            |
| 2013442903                              | formate acetyltransferase                                                                | C7757   | 8070           | 44       | 11.9          | Lachnospiraceae sp.              | yes                        |
| 2013448717                              | acetyl-CoA acetyltransferases                                                            | C10214  | 1379           | 41       | 2             | Bacteria                         | yes                        |
| 2013448754                              | 3-hydroxyacyl-CoA dehydrogenase                                                          | C10230  | 4405           | 44       | 2.3           | Lachnospiraceae sp.              | yes*                       |
| 2013431260                              | Enoyl-CoA hydratase                                                                      | C2757   | 1682           | 42       | 5             | Lachnospiraceae sp. <sup>¶</sup> | yes**                      |
| 2021679635                              | butyryl-CoA dehydrogenase                                                                | Sc00013 | 30412          | 43       | na            | Lachnospiraceae sp.              | <i>linked to rrs</i>       |
| 2013433813                              | phosphate butyryltransferase                                                             | C3772   | 5746           | 41       | 3.9           | Lachnospiraceae sp.              | yes                        |
| 2013433811                              | butyrate kinase                                                                          | C3772   | 5746           | 41       | 3.9           | Lachnospiraceae sp.              | yes                        |
| <b><u>Carbohydrate metabolism</u></b>   |                                                                                          |         |                |          |               |                                  |                            |
| 2013439905                              | xylose isomerase                                                                         | C6448   | 6165           | 46       | 4.6           | Lachnospiraceae sp.              | no                         |
| 2013438746                              | xylulokinase                                                                             | C5940   | 7656           | 46       | 8.6           | Lachnospiraceae sp.              | yes**                      |
| 2013435301                              | galactokinase                                                                            | C4425   | 6787           | 44       | 5.9           | Lachnospiraceae sp.              | yes                        |

|                                                         |                                                     |        |       |    |     |                                  |       |
|---------------------------------------------------------|-----------------------------------------------------|--------|-------|----|-----|----------------------------------|-------|
| 2013437796                                              | galactose-1-phosphate uridylyltransferase, family 2 | C5483  | 14338 | 45 | 7.8 | Lachnospiraceae sp. <sup>¶</sup> | yes*  |
| <b>Polysaccharide degradation (Glycosyl Hydrolases)</b> |                                                     |        |       |    |     |                                  |       |
| 2013445168                                              | Endoglucanase (GH5)                                 | C8682  | 9198  | 43 | 3.7 | Lachnospiraceae sp.              | yes   |
| 2013447234                                              | Endoglucanase (GH5)                                 | C9601  | 9592  | 35 | 6.3 | Lachnospiraceae                  | yes   |
| 2013444844                                              | Endoglucanase (GH5)                                 | C8546  | 4602  | 43 | 3.8 | Lachnospiraceae sp.              | yes   |
| 2013448228                                              | cellobiose phosphorylase (GH94) + CBM_X             | C10018 | 6263  | 45 | 5.5 | Lachnospiraceae sp.              | yes   |
| 2013443497                                              | chitobiose phosphorylase (GH94) + CBM_X             | C7999  | 4352  | 46 | 5   | Lachnospiraceae sp.              | yes   |
| 2013443501                                              | chitobiose phosphorylase (GH94)                     | C8001  | 7562  | 46 | 4   | Lachnospiraceae sp.              | yes   |
| 2013449834                                              | Cellobiose phosphorylase (Glyco_transf_36)          | C10691 | 14051 | 43 | 4.3 | Lachnospiraceae sp.              | yes** |
| 2013446476                                              | Glycosyl hydrolases family 43 (GH43) + CBM_6        | C9278  | 11504 | 43 | 5   | Lachnospiraceae sp.              | yes   |
| 2013443244                                              | Glycosyl hydrolases family 43 (GH43)                | C7901  | 16905 | 42 | 6.4 | Lachnospiraceae sp.              | yes   |
| 2013440091                                              | Glycosyl hydrolases family 43 (GH43)                | C6520  | 6815  | 42 | 3.7 | Lachnospiraceae sp.              | yes   |
| 2013427252                                              | Glycosyl hydrolases family 43 (GH43) + CBM_6        | C1059  | 7331  | 46 | 3.8 | Lachnospiraceae sp.              | yes   |
| 2013453133                                              | Glycosyl hydrolases family 43 (GH43)                | C12152 | 2769  | 44 | 3.9 | Lachnospiraceae sp.              | yes*  |
| 2013444633                                              | xylanase/chitin deacetylase (CE4)                   | C8455  | 11957 | 43 | 3.8 | Lachnospiraceae sp.              | yes*  |
| 2013443248                                              | (Pectin) acetyl esterase (CE12)                     | C7901  | 16905 | 42 | 6.4 | Lachnospiraceae sp.              | yes   |
| 2013443249                                              | Bacterial alpha-L-rhamnosidase (GH78)               | C7901  | 16905 | 42 | 6.4 | Lachnospiraceae sp.              | yes   |
| 2013453492                                              | Bacterial alpha-L-rhamnosidase (GH78)               | C12307 | 11190 | 42 | 4.4 | Lachnospiraceae sp.              | yes   |
| 2013453493                                              | Bacterial alpha-L-rhamnosidase (GH78)               | C12307 | 11190 | 42 | 4.4 | Lachnospiraceae sp.              | yes   |
| 2013427250                                              | Bacterial alpha-L-rhamnosidase (GH78)               | C1059  | 7331  | 46 | 3.8 | Lachnospiraceae sp.              | yes   |
| 2013448646                                              | Bacterial alpha-L-rhamnosidase (GH78)               | C10192 | 9511  | 41 | 4.4 | Lachnospiraceae sp.              | yes   |
| 2013448647                                              | (Pectin) acetyl esterase (CE12)                     | C10192 | 9511  | 41 | 4.4 | Lachnospiraceae sp.              | yes   |
| 2013451239                                              | Bacterial alpha-L-rhamnosidase (GH78)               | C11302 | 2042  | 44 | 3   | Lachnospiraceae sp.              | yes   |
| 2013446051                                              | Bacterial alpha-L-rhamnosidase (GH78)               | C9081  | 4530  | 45 | 5   | Lachnospiraceae sp.              | yes   |
| 2013446052                                              | Bacterial alpha-L-rhamnosidase (GH78)               | C9081  | 4530  | 45 | 5   | Lachnospiraceae sp.              | yes   |
| 2013451241                                              | Bacterial alpha-L-rhamnosidase (GH78)               | C11303 | 2150  | 44 | 2.9 | Lachnospiraceae sp.              | yes   |
| 2013442720                                              | Bacterial alpha-L-rhamnosidase (GH78)               | C7686  | 2202  | 43 | 2.5 | Lachnospiraceae sp.              | yes   |
| 2013444105                                              | Bacterial alpha-L-rhamnosidase (GH78)               | C8237  | 2956  | 43 | 3.5 | Lachnospiraceae sp.              | yes   |
| 2013444107                                              | Tannase and feruloyl esterase                       | C8237  | 2956  | 43 | 3.5 | Lachnospiraceae sp.              | yes*  |
| 2013451515                                              | Bacterial alpha-L-rhamnosidase (GH78)               | C11414 | 7027  | 39 | 3.8 | Lachnospiraceae sp.              | yes   |
| 2013440816                                              | Bacterial alpha-L-rhamnosidase (GH78)               | C6868  | 6113  | 45 | 5.5 | Lachnospiraceae sp.              | yes   |
| 2013439199                                              | Bacterial alpha-L-rhamnosidase (GH78)               | C6159  | 4764  | 42 | 5.5 | Lachnospiraceae sp.              | yes*  |

|             |                                             |        |       |    |     |                     |       |
|-------------|---------------------------------------------|--------|-------|----|-----|---------------------|-------|
| 2013435994  | Bacterial alpha-L-rhamnosidase (GH78)       | C4724  | 3321  | 41 | 3.8 | Lachnospiraceae sp. | yes   |
| 2013448874  | Bacterial alpha-L-rhamnosidase (GH78)       | C10273 | 8069  | 41 | 6.9 | Lachnospiraceae sp. | yes   |
| 2013448862  | Trehalose and maltose hydrolases (GH65)     | C10271 | 6939  | 42 | 4   | Lachnospiraceae sp. | no    |
| 2013448864  | Trehalose and maltose hydrolases (GH65)     | C10271 | 6939  | 42 | 4   | Lachnospiraceae sp. | no    |
| 2013448865  | Trehalose and maltose hydrolases (GH65)     | C10271 | 6939  | 42 | 4   | Lachnospiraceae sp. | no    |
| 2013434324? | Beta-glucanase (GH16) + CBM4                | C3993  | 5683  | 42 | 4.1 | Lachnospiraceae     | yes   |
| 2013449837  | Beta-glucosidase-related glycosidases (GH3) | C10691 | 14051 | 43 | 4.3 | Lachnospiraceae sp. | yes   |
| 2013451858  | Beta-glucosidase-related glycosidases (GH3) | C11554 | 10983 | 46 | 5.1 | Lachnospiraceae sp. | yes** |
| 2013451861  | Beta-glucosidase-related glycosidases (GH3) | C11554 | 10983 | 46 | 5.1 | Lachnospiraceae sp. | yes   |
| 2013427243  | Beta-glucosidase-related glycosidases (GH3) | C1057  | 7475  | 46 | 2.9 | Lachnospiraceae sp. | yes** |
| 2013426449  | Beta-glucosidase-related glycosidases (GH3) | C739   | 1599  | 44 | 2.8 | Lachnospiraceae sp. | yes*  |
| 2013446160  | Beta-glucosidase-related glycosidases (GH3) | C9129  | 3275  | 45 | 4.1 | Lachnospiraceae sp. | yes*  |
| 2013435570  | Beta-glucosidase-related glycosidases (GH3) | C4538  | 5301  | 43 | 4.1 | Lachnospiraceae sp. | yes   |
| 2013451777  | Beta-glucosidase-related glycosidases (GH3) | C11521 | 2063  | 46 | 3.6 | Lachnospiraceae sp. | yes   |
| 2013439498  | Beta-glucosidase-related glycosidases (GH3) | C6287  | 1837  | 44 | 4.6 | Lachnospiraceae sp. | yes*  |
| 2013443020  | Beta-glucosidase-related glycosidases (GH3) | C7808  | 5116  | 42 | 2.6 | Lachnospiraceae sp. | yes*  |
| 2013436012  | Beta-glucosidase-related glycosidases (GH3) | C4734  | 2905  | 43 | 2.7 | Lachnospiraceae sp. | yes   |
| 2013439903  | Beta-glucosidase-related glycosidases (GH3) | C6448  | 6165  | 46 | 4.6 | Lachnospiraceae sp. | yes** |
| 2013435663  | Beta-glucosidase-related glycosidases (GH3) | C4583  | 6675  | 43 | 4.8 | Lachnospiraceae sp. | yes*  |
| 2013442974  | Beta-glucosidase-related glycosidases (GH3) | C7786  | 14884 | 44 | 5.5 | Lachnospiraceae sp. | yes   |
| 2013426780  | Beta-glucosidase-related glycosidases (GH3) | C882   | 15829 | 43 | 5.8 | Lachnospiraceae sp. | yes   |
| 2013452678  | Beta-glucosidase-related glycosidases (GH3) | C11961 | 11562 | 43 | 4.5 | Lachnospiraceae sp. | yes** |
| 2013451992  | Beta-glucosidase-related glycosidases (GH3) | C11624 | 9288  | 42 | 4.6 | Lachnospiraceae sp. | yes   |
| 2013439912  | Beta-galactosidase/beta-glucuronidase (GH2) | C6450  | 7097  | 43 | 3.3 | Lachnospiraceae sp. | yes   |
| 2013440092  | Beta-galactosidase/beta-glucuronidase (GH2) | C6520  | 6815  | 42 | 3.7 | Lachnospiraceae sp. | yes   |
| 2013427242  | Beta-galactosidase/beta-glucuronidase (GH2) | C1057  | 7475  | 46 | 2.9 | Lachnospiraceae sp. | no    |
| 2013451356  | Beta-galactosidase/beta-glucuronidase (GH2) | C11359 | 3789  | 40 | 2.8 | Lachnospiraceae sp. | yes*  |
| 2013430044  | Beta-galactosidase/beta-glucuronidase (GH2) | C2209  | 5941  | 43 | 4.3 | Lachnospiraceae sp. | yes*  |
| 2013444111  | Beta-galactosidase/beta-glucuronidase (GH2) | C8238  | 7061  | 45 | 6.8 | Lachnospiraceae sp. | yes   |
| 2013437620  | Beta-galactosidase/beta-glucuronidase (GH2) | C5398  | 6314  | 42 | 4.3 | Lachnospiraceae sp. | yes*  |
| 2013444646  | Beta-galactosidase/beta-glucuronidase (GH2) | C8460  | 4660  | 40 | 3.2 | Lachnospiraceae sp. | yes   |
| 2013451698  | Beta-galactosidase/beta-glucuronidase (GH2) | C11492 | 5954  | 46 | 4.5 | Lachnospiraceae sp. | yes*  |
| 2013444120  | Beta-galactosidase/beta-glucuronidase (GH2) | C8240  | 4843  | 47 | 3   | Lachnospiraceae sp. | yes*  |

|            |                                                 |        |       |    |     |                     |       |
|------------|-------------------------------------------------|--------|-------|----|-----|---------------------|-------|
| 2013428853 | Beta-galactosidase/beta-glucuronidase (GH2)     | C1699  | 6187  | 45 | 3.4 | Lachnospiraceae sp. | yes   |
| 2013451857 | Glycosyl hydrolases family 32 N terminal (GH32) | C11554 | 10983 | 46 | 5.1 | Lachnospiraceae sp. | yes   |
| 2013445378 | Predicted glycosylase (GH43?)                   | C8762  | 12789 | 45 | 5.1 | Lachnospiraceae sp. | yes** |
| 2013445379 | Predicted glycosylase (GH43?)                   | C8762  | 12789 | 45 | 5.1 | Lachnospiraceae sp. | yes*  |
| 2013445380 | N-acyl-D-glucosamine 2-epimerase (GH88)         | C8762  | 12789 | 45 | 5.1 | Lachnospiraceae sp. | yes*  |
| 2013445381 | carbohydrate ABC transporter membrane protein   | C8762  | 12789 | 45 | 5.1 | Lachnospiraceae sp. | yes** |
| 2013445382 | carbohydrate ABC transporter membrane protein   | C8762  | 12789 | 45 | 5.1 | Lachnospiraceae sp. | yes** |
| 2013445383 | carbohydrate-binding protein                    | C8762  | 12789 | 45 | 5.1 | Lachnospiraceae sp. | yes*  |
| 2013439373 | Glycosyl Hydrolase Family 88 (GH88)             | C6233  | 14253 | 42 | 5.5 | Lachnospiraceae sp. | yes   |
| 2013439374 | Acetyl xylan esterase (AXE1)                    | C6233  | 14253 | 42 | 5.5 | Lachnospiraceae sp. | yes   |
| 2013439377 | Glycosyl Hydrolase Family 88 (GH88)             | C6233  | 14253 | 42 | 5.5 | Lachnospiraceae sp. | yes   |
| 2013445373 | Alpha-galactosidase (GH27)                      | C8762  | 12789 | 45 | 5.1 | Lachnospiraceae sp. | yes*  |
| 2013435299 | Alpha-galactosidase (GH27)                      | C4425  | 6787  | 44 | 5.9 | Lachnospiraceae sp. | yes   |
| 2013435568 | Alpha-glucosidase (GH31)                        | C4537  | 4646  | 42 | 4.5 | Lachnospiraceae sp. | yes   |
| 2013445373 | Alpha-galactosidase (GH36)                      | C8762  | 12789 | 45 | 5.1 | Lachnospiraceae sp. | yes*  |
| 2013454015 | Beta-galactosidase (GH42)                       | C12570 | 5426  | 43 | 4.6 | Lachnospiraceae sp. | yes   |
| 2013426776 | Beta-galactosidase (GH42)                       | C882   | 15829 | 43 | 5.8 | Lachnospiraceae sp. | yes   |
| 2013454012 | Beta-galactosidase (GH42)                       | C12569 | 3391  | 44 | 4.2 | Lachnospiraceae sp. | yes   |
| 2013435574 | Beta-galactosidase (GH42)                       | C4539  | 2451  | 45 | 2.9 | Lachnospiraceae sp. | yes** |
| 2013426777 | Beta-galactosidase (Glyco_hydro_42M)            | C882   | 15829 | 43 | 5.8 | Lachnospiraceae sp. | yes** |
| 2013438121 | Beta-glucosidase/ Beta-galactosidase (GH1)      | C5644  | 3964  | 43 | 3.3 | Lachnospiraceae sp. | yes   |
| 2013438120 | Beta-glucosidase/ Beta-galactosidase (GH1)      | C5644  | 3964  | 43 | 3.3 | Lachnospiraceae sp. | yes   |
| 2013442256 | Beta-glucosidase/ Beta-galactosidase (GH1)      | C7479  | 3998  | 41 | 2.1 | Lachnospiraceae sp. | yes   |
| 2013443412 | Beta-glucosidase/ Beta-galactosidase (GH1)      | C7962  | 4332  | 45 | 3.7 | Lachnospiraceae sp. | yes   |
| 2013453485 | Beta-glucosidase/ Beta-galactosidase (GH1)      | C12307 | 11190 | 42 | 4.4 | Lachnospiraceae sp. | yes   |
| 2013451695 | Beta-glucosidase/ Beta-galactosidase (GH1)      | C11491 | 4831  | 45 | 2.9 | Lachnospiraceae sp. | yes*  |
| 2013444110 | Beta-glucosidase/ Beta-galactosidase (GH1)      | C8238  | 7061  | 45 | 6.8 | Lachnospiraceae sp. | yes*  |
| 2013445359 | Beta-glucosidase/ Beta-galactosidase (GH1)      | C8756  | 4597  | 45 | 4.5 | Lachnospiraceae sp. | yes   |
| 2013451364 | Beta-glucosidase/ Beta-galactosidase (GH1)      | C11361 | 5672  | 43 | 4.8 | Lachnospiraceae sp. | yes*  |
| 2013436022 | Beta-glucosidase/ Beta-galactosidase (GH1)      | C4735  | 17773 | 41 | 3.6 | Lachnospiraceae sp. | yes   |
| 2013432555 | Beta-glucosidase/ Beta-galactosidase (GH1)      | C3270  | 12382 | 43 | 5.4 | Lachnospiraceae sp. | yes   |
| 2013445318 | Beta-glucosidase/ Beta-galactosidase (GH1)      | C8733  | 1839  | 44 | 2.8 | Lachnospiraceae sp. | yes   |
| 2013443935 | Alpha-amylase (GH13)                            | C8199  | 9924  | 43 | 4.3 | Lachnospiraceae sp. | no    |

|                                         |                                                                  |         |       |    |     |                                  |       |
|-----------------------------------------|------------------------------------------------------------------|---------|-------|----|-----|----------------------------------|-------|
| 2013443962                              | Alpha-amylase (GH13)                                             | C8208   | 5838  | 45 | 6.9 | Lachnospiraceae sp.              | no    |
| 2013439493                              | Alpha-amylase (GH13) + CBM34                                     | C6285   | 3156  | 44 | 3.9 | Lachnospiraceae sp.              | yes   |
| 2013434949                              | Alpha-amylase (GH13)                                             | C4274   | 5705  | 42 | 3.1 | Lachnospiraceae sp.              | yes   |
| 2013452210                              | Alpha-amylase (GH13)                                             | C11732  | 2671  | 47 | 4.7 | Lachnospiraceae sp.              | no    |
| 2013443938                              | Alpha-amylase (GH13)                                             | C8199   | 9924  | 43 | 4.3 | Lachnospiraceae sp.              | no    |
| 2013434952                              | Alpha-amylase (GH13)                                             | C4274   | 5705  | 42 | 3.1 | Lachnospiraceae sp.              | yes** |
| 2013443326                              | Alpha-amylase (GH13) + CBM48                                     | C7928   | 10039 | 45 | 4.3 | Lachnospiraceae sp.              | yes*  |
| 2021679642                              | Alpha-amylase (GH13)                                             | Sc00013 | 30412 | 43 | na  | Lachnospiraceae sp.              | yes*  |
| 2021679644                              | Alpha-amylase (GH13)                                             | Sc00013 | 30412 | 43 | na  | Lachnospiraceae sp.              | yes** |
| 2013439915                              | 4-alpha-glucanotransferase (GH77)                                | C6450   | 7097  | 43 | 3.3 | Lachnospiraceae sp.              | yes   |
| 2013426634                              | 4-alpha-glucanotransferase (GH77)                                | C827    | 3191  | 43 | 2.3 | Lachnospiraceae sp.              | yes*  |
| 2013427663                              | 4-alpha-glucanotransferase (GH77)                                | C1227   | 3392  | 41 | 2.4 | Lachnospiraceae sp.              | yes*  |
| 2013445360                              | Glycosyl Hydrolase Family 106 (GH106)                            | C8756   | 4597  | 45 | 4.5 | Lachnospiraceae sp.              | yes   |
| 2013451692                              | F5/8 type C domain (CBM32)                                       | C11491  | 4831  | 45 | 2.9 | Lachnospiraceae sp.              | yes*  |
| 2013436031                              | N-acetylglucosamine 6-phosphate deacetylase (CE9)                | C4735   | 17773 | 41 | 3.6 | Lachnospiraceae sp.              | yes   |
| <b><u>Oxidative phosphorylation</u></b> |                                                                  |         |       |    |     |                                  |       |
| 2013439450                              | proton translocating ATP synthase, F1 alpha subunit              | C6263   | 6739  | 45 | 7.5 | Lachnospiraceae sp.              | yes   |
| 2013439449                              | ATP synthase, F1 gamma subunit                                   | C6263   | 6739  | 45 | 7.5 | Lachnospiraceae sp.              | yes   |
| 2013439448                              | ATP synthase F1 subcomplex beta subunit                          | C6263   | 6739  | 45 | 7.5 | Lachnospiraceae sp.              | yes   |
| 2013439447                              | ATP synthase, F1 epsilon subunit                                 | C6263   | 6739  | 45 | 7.5 | Lachnospiraceae sp.              | yes   |
| 2013444296                              | Archaeal/vacuolar-type H <sup>+</sup> -ATPase subunit I          | C8319   | 9408  | 46 | 5   | Lachnospiraceae sp.              | yes   |
| 2013444297                              | H(+)-transporting ATP synthase, vacuolar type, subunit D         | C8319   | 9408  | 46 | 5   | Lachnospiraceae sp.              | yes   |
| 2013444298                              | Archaeal/vacuolar-type H <sup>+</sup> -ATPase subunit B          | C8319   | 9408  | 46 | 5   | Lachnospiraceae sp.              | yes   |
| 2013444299                              | Archaeal/vacuolar-type H <sup>+</sup> -ATPase subunit A          | C8319   | 9408  | 46 | 5   | Lachnospiraceae sp.              | yes   |
| 2013444300                              | Archaeal/vacuolar-type H <sup>+</sup> -ATPase subunit A          | C8319   | 9408  | 46 | 5   | Lachnospiraceae sp.              | yes   |
| 2013444303                              | Archaeal/vacuolar-type H <sup>+</sup> -ATPase subunit E          | C8319   | 9408  | 46 | 5   | Lachnospiraceae sp.              | yes   |
| 2013432559                              | NADH:flavin oxidoreductases                                      | C3270   | 12382 | 43 | 5.4 | Lachnospiraceae sp.              | yes*  |
| 2013451524                              | NADH:flavin oxidoreductases                                      | C11415  | 11810 | 41 | 5.4 | Lachnospiraceae sp. <sup>¶</sup> | yes   |
| 2013451526                              | Succinate dehydrogenase/fumarate reductase, flavoprotein subunit | C11415  | 11810 | 41 | 5.4 | Lachnospiraceae sp. <sup>¶</sup> | no    |

| <b>Transport</b> |                                                                              |        |       |    |     |                     |       |
|------------------|------------------------------------------------------------------------------|--------|-------|----|-----|---------------------|-------|
| 2013445381       | carbohydrate ABC transporter membrane protein                                | C8762  | 12789 | 45 | 5.1 | Lachnospiraceae sp. | yes** |
| 2013445382       | carbohydrate ABC transporter membrane protein                                | C8762  | 12789 | 45 | 5.1 | Lachnospiraceae sp. | yes** |
| 2013445383       | carbohydrate-binding protein                                                 | C8762  | 12789 | 45 | 5.1 | Lachnospiraceae sp. | yes** |
| 2013447231       | ABC-type sugar transport system, periplasmic component                       | C9601  | 9592  | 35 | 6.3 | Lachnospiraceae     | yes   |
| 2013447232       | carbohydrate ABC transporter membrane protein                                | C9601  | 9592  | 35 | 6.3 | Lachnospiraceae     | yes   |
| 2013447233       | ABC-type polysaccharide transport system, permease component                 | C9601  | 9592  | 35 | 6.3 | Lachnospiraceae     | yes   |
| 2013445167       | Sugar transporter                                                            | C8682  | 9198  | 43 | 3.7 | Lachnospiraceae sp. | yes   |
| 2013448231       | carbohydrate ABC transporter membrane protein                                | C10018 | 6263  | 45 | 5.5 | Lachnospiraceae sp. | yes   |
| 2013448232       | carbohydrate ABC transporter membrane protein                                | C10018 | 6263  | 45 | 5.5 | Lachnospiraceae sp. | yes   |
| 2013448233       | carbohydrate ABC transporter membrane protein                                | C10018 | 6263  | 45 | 5.5 | Lachnospiraceae sp. | yes   |
| 2013444889       | cobalt ABC transporter                                                       | C8568  | 5022  | 44 | 2.5 | Lachnospiraceae sp. | yes   |
| 2013444890       | cobalt ABC transporter                                                       | C8568  | 5022  | 44 | 2.5 | Lachnospiraceae sp. | yes   |
| 2013432529       | cobalt ABC transporter                                                       | C3265  | 11764 | 45 | 5.4 | Lachnospiraceae sp. | yes   |
| 2013432530       | cobalt ABC transporter                                                       | C3265  | 11764 | 45 | 5.4 | Lachnospiraceae sp. | yes   |
| 2013432536       | ABC-type sugar transport system                                              | C3265  | 11764 | 45 | 5.4 | Lachnospiraceae sp. | yes   |
| 2013432537       | ABC-type sugar transport system                                              | C3265  | 11764 | 45 | 5.4 | Lachnospiraceae sp. | yes   |
| 2013443386       | sulfate ABC transporter, ATP-binding protein                                 | C7956  | 6242  | 43 | 4.5 | Lachnospiraceae sp. | yes** |
| 2013443387       | sulfate ABC transporter, permease component                                  | C7956  | 6242  | 43 | 4.5 | Lachnospiraceae sp. | yes   |
| 2013443388       | sulfate ABC transporter, permease component                                  | C7956  | 6242  | 43 | 4.5 | Lachnospiraceae sp. | yes   |
| 2013443389       | sulfate ABC transporter, permease protein CysT                               | C7956  | 6242  | 43 | 4.5 | Lachnospiraceae sp. | yes** |
| 2013443390       | sulfate/thiosulfate-binding protein                                          | C7956  | 6242  | 43 | 4.5 | Lachnospiraceae sp. | yes** |
| 2013448538       | amino acid-binding protein                                                   | C10144 | 4280  | 45 | 4.2 | Lachnospiraceae sp. | yes   |
| 2013448539       | ABC-type polar amino acid transport system, ATPase component                 | C10144 | 4280  | 45 | 4.2 | Lachnospiraceae sp. | yes*  |
| 2013448540       | ABC transporter, permease protein, 3-TM region, His/Glu/Gln/Arg/opine family | C10144 | 4280  | 45 | 4.2 | Lachnospiraceae sp. | yes   |
| 2013448541       | ABC transporter, permease protein                                            | C10144 | 4280  | 45 | 4.2 | Lachnospiraceae sp. | yes   |
| 2013452885       | monosaccharide-binding protein                                               | C12040 | 5528  | 43 | 3.4 | Lachnospiraceae sp. | yes** |
| 2013452886       | monosaccharide ABC transporter protein                                       | C12040 | 5528  | 43 | 3.4 | Lachnospiraceae sp. | yes** |
| 2013452887       | monosaccharide ABC transporter protein                                       | C12040 | 5528  | 43 | 3.4 | Lachnospiraceae sp. | yes** |

|                                              |                                                                                |        |       |    |     |                                  |       |
|----------------------------------------------|--------------------------------------------------------------------------------|--------|-------|----|-----|----------------------------------|-------|
| 2013452888                                   | monosaccharide ABC transporter ATP-binding protein                             | C12040 | 5528  | 43 | 3.4 | Lachnospiraceae sp.              | yes   |
| <b>Protein export: sec dependent pathway</b> |                                                                                |        |       |    |     |                                  |       |
| 2013433181                                   | protein translocase subunit secD                                               | C3525  | 2783  | 42 | 3.2 | Lachnospiraceae sp.              | yes*  |
| 2013445160                                   | protein translocase subunit secA                                               | C8681  | 1920  | 42 | 1.8 | Lachnospiraceae sp. <sup>¶</sup> | yes*  |
| <b>Sulfur metabolism</b>                     |                                                                                |        |       |    |     |                                  |       |
| 2013443023                                   | sulfate adenylyltransferase subunit 1                                          | C7809  | 12588 | 46 | 6.3 | Lachnospiraceae sp.              | yes   |
| 2013443024                                   | sulfate adenylyltransferase subunit 2                                          | C7809  | 12588 | 46 | 6.3 | Lachnospiraceae sp.              | yes   |
| 2013443025                                   | 4Fe-4S binding domain.                                                         | C7809  | 12588 | 46 | 6.3 | Lachnospiraceae sp.              | yes** |
| 2013443026                                   | adenosine phosphosulphate reductase, alpha subunit / adenylylsulfate reductase | C7809  | 12588 | 46 | 6.3 | Lachnospiraceae sp.              | yes   |
| 2013443027                                   | SirA-like protein                                                              | C7809  | 12588 | 46 | 6.3 | Lachnospiraceae sp.              | yes   |
| 2013443028                                   | Dissimilatory sulfite reductase                                                | C7809  | 12588 | 46 | 6.3 | Lachnospiraceae sp.              | yes*  |

1 \* indicates best match; \*\* indicates best match is *Roseburia intestinalis* (*Lachnospiraceae*), the closest relative with an available genome sequence (based on  
2 *rrs* comparisons); <sup>¶</sup> contig is linked to an uncultured *Lachnospiraceae* bacterium scaffold, based on Phylopythia analysis.  
3  
4  
5  
6  
7  
8  
9  
10  
11  
12
